# Supplementary material for: Integrative Severity Scale for Diabetic Macular Atrophy and Ischemia Using Structural OCT and OCT Angiography
Source: Research Square preprint supplement (doi:10.21203/rs.3.rs-7000479/v1), 2025-07-22
Supplement: Supplementary file 2 [file 6c4ad7884b607c2e8c55acf6.pdf]

**Supplementary Table S1. Patients' characteristics.**

| Variables                                  |                      |
|--------------------------------------------|----------------------|
| Eyes/patients                              | 327/327              |
| Age (years)                                | 66 (54–73.5)         |
| Sex (male/female)                          | 207/120              |
| Hemoglobin A1c (%)                         | 7.6 (6.8–8.7)        |
| Duration of diabetes (years)               | 16 (9–23)            |
| Systemic hypertension (present/absent)     | 207/120              |
| Dyslipidemia (present/absent)              | 149/178              |
| LogMAR                                     | 0.000 (-0.079–0.155) |
| Phakia/pseudophakia                        | 154/173              |
| International DR severity grade (eyes)     |                      |
| Mild NPDR                                  | 13                   |
| Moderate NPDR                              | 172                  |
| Severe NPDR                                | 22                   |
| PDR                                        | 120                  |
| Central subfield thickness (μm)            | 273 (251–290)        |
| NPS counts in the superficial layer        | 333 (221–511)        |
| NPS counts in the deep layer               | 878 (669–1179)       |
| Prior PRP (present/absent)                 | 181/146              |
| Prior STTA (present/absent)                | 29/298               |
| Prior anti-VEGF injection (present/absent) | 38/289               |
| Prior vitrectomy (present/absent)          | 50/277               |

Data are shown as numbers or median (interquartile range).

Abbreviations: DR = diabetic retinopathy; logMAR = logarithm of the minimum angle of resolution; NPDR = nonproliferative diabetic retinopathy; NPS = nonperfusion square; PDR = proliferative diabetic retinopathy; PRP = panretinal photocoagulation; STTA = subTenon's injection of triamcinolone acetonide.

**Supplementary Table S2. Comparisons of neurovascular parameters among three groups based on uniform manifold approximation and projection and subsequent clustering.**

| Variables                           | Mild          | Intermediate   | Severe             | P-value |
|-------------------------------------|---------------|----------------|--------------------|---------|
| Retinal thickness (μm)              |               |                |                    |         |
| Nasal subfield                      | 351 (336–367) | 339 (322–355)* | 308 (284–332)*,†   | <0.001  |
| Superior subfield                   | 347 (336–359) | 337 (321–353)  | 288 (263–322)*,†   | <0.001  |
| Temporal subfield                   | 338 (318–350) | 326 (310–342)  | 270 (251–302)*,†   | <0.001  |
| Inferior subfield                   | 336 (322–354) | 328 (319–344)* | 287 (265–308)*,†   | <0.001  |
| NPS counts in the superficial layer |               |                |                    |         |
| Central subfield                    | 147 (117–178) | 210 (184–246)* | 309 (268–347)*,†   | <0.001  |
| All parafoveal subfields            | 60 (27–111)   | 138 (83–208)*  | 570 (396–671)*,†   | <0.001  |
| Nasal subfield                      | 11 (5–24.5)   | 33 (20–52)*    | 122 (72–155)*,†    | <0.001  |
| Superior subfield                   | 15 (5–25)     | 30 (19–44)*    | 114 (74–172)*,†    | <0.001  |
| Temporal subfield                   | 17 (7–26)     | 31 (18–55)*    | 152 (109–200)*,†   | <0.001  |
| Inferior subfield                   | 13 (5–28)     | 31 (17–50)*    | 129 (84–169)*,†    | <0.001  |
| NPS counts in the deep layer        |               |                |                    |         |
| Central subfield                    | 342 (306–363) | 392 (370–402)* | 374 (349–396)*,†   | <0.001  |
| All parafoveal subfields            | 281 (186–373) | 611 (500–745)* | 1014 (882–1275)*,† | <0.001  |
| Nasal subfield                      | 71 (47–106)   | 166 (133–209)* | 256 (218–326)*,†   | <0.001  |
| Superior subfield                   | 45 (26–74)    | 132 (94–169)*  | 240 (193–316)*,†   | <0.001  |
| Temporal subfield                   | 92 (64–124)   | 188 (148–239)* | 278 (241–365)*,†   | <0.001  |
| Inferior subfield                   | 46 (25–80)    | 121 (84–177)*  | 261 (199–349)*,†   | <0.001  |

Data are shown as numbers or median (interquartile range).

Abbreviations: logMAR = logarithm of the minimum angle of resolution; NPS = nonperfusion square. \* $P < 0.05$  vs. Mild; † $P < 0.01$  vs. Moderate.

**Supplementary Table S3. Comparisons of clinical parameters between two subgroups of eyes with a central subfield thickness < 222  $\mu\text{m}$ .**

|                                              | <b>Mild+Intermediate<br/>(n=14)</b> | <b>Severe<br/>(n=29)</b> | <b><i>P</i>-value</b> |
|----------------------------------------------|-------------------------------------|--------------------------|-----------------------|
| NPS counts in the superficial layer          | 360 (320–442)                       | 934 (696–1063)           | <0.001                |
| NPS counts in the deep layer                 | 795 (618–961)                       | 1523 (1258–1830)         | <0.001                |
| Central subfield thickness ( $\mu\text{m}$ ) | 207 (194–219)                       | 185 (153–206)            | 0.006                 |
| EZ line (continuous/not continuous)          | 12/2                                | 8/21                     | <0.001                |
| logMAR                                       | 0.071 (0.000–0.155)                 | 0.523 (0.222–0.699)      | <0.001                |

Data are shown as numbers or median (interquartile range).

Abbreviations: EZ = ellipsoid zone; logMAR = logarithm of the minimum angle of resolution; NPS = nonperfusion square.
